# Supplementary material
Source: publisher figshare collection journal article supplement (https://acs.figshare.com/ndownloader/files/4718611)
Supplement: Supplementary file 1 [file 4718611]

## SUPPORTING INFORMATION

### Fabrication of Carbon Nanotube-Polyaniline Composites via Electrostatic

### Adsorption in Aqueous Colloids

Xing-Bin Yan, Zhao-Jun Han, Yi Yang, Beng-Kang Tay

*School of Electrical and Electronic Engineering, Nanyang Technological University, Singapore 639798*

**S1. Optical micrographs showing the dispersion of the pristine and the oxidized MWNTs in HCl solution (pH=2.6), respectively.**

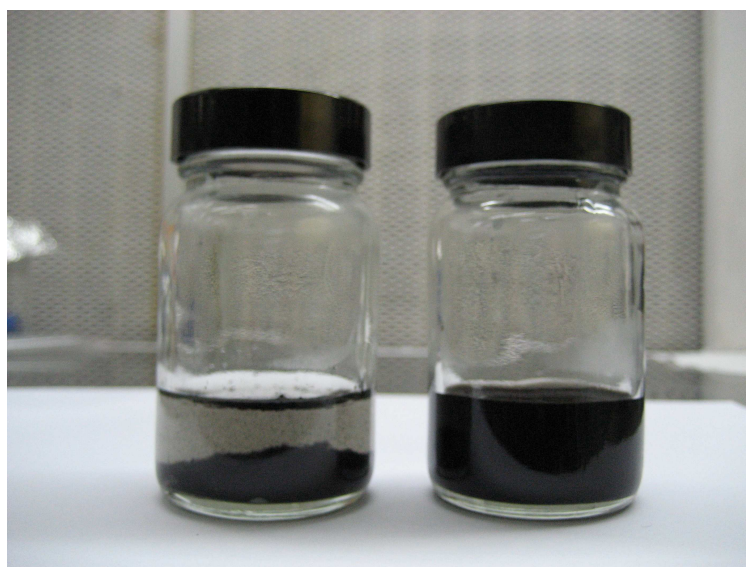

Figure S1. Optical micrographs of the pristine MWNTs (8 mg) were dispersed in 20 mL of HCl solution (pH=2.6) after standing for 1h (left) and the oxidized MWNTs (8 mg) were dispersed in the same solution after standing for one month (right).

**S2. . High-resolution TEM image showing the defects on CNT.**

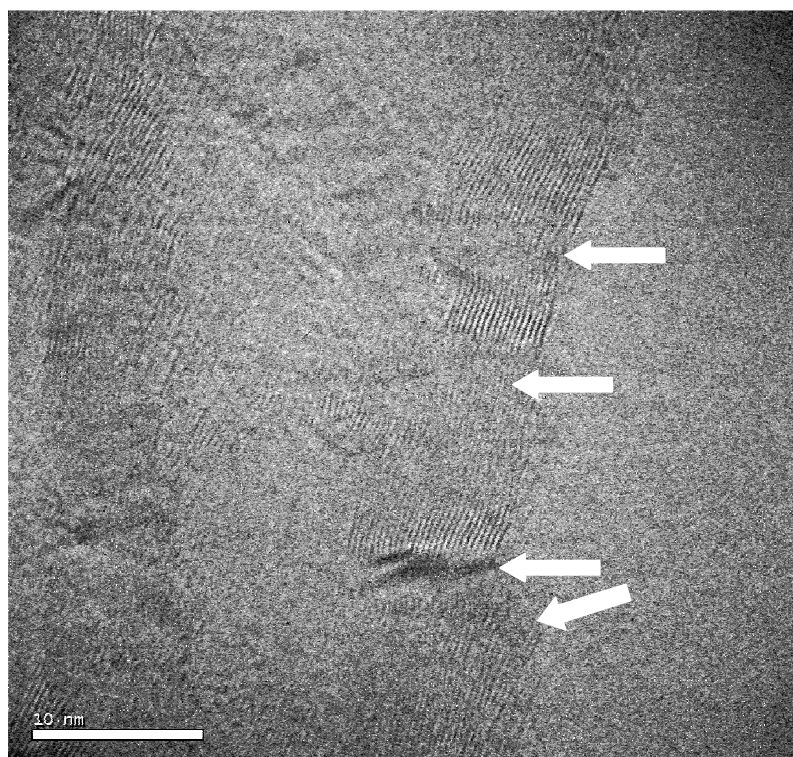

Figure S2. High-resolution TEM image of the oxidized MWNT. Arrows show sites of the destruction of graphite multilayer by concentrated nitric acid-sulfuric acid treatment. Scale bar, 10 nm.
